# Supplementary material for: Voltage-dependent Gating of the Cystic Fibrosis Transmembrane Conductance Regulator Cl− Channel
Source: PubMed Central journal article supplement — J Gen Physiol. 2003 Nov;122(5):605–20. doi: 10.1085/jgp.200308921 (PMC2229579; doi:10.1085/jgp.200308921), 2003-11
Supplement: jgenphysiol_jgp.200308921_1.pdf [file jgenphysiol_jgp.200308921_1.pdf]

To investigate the possibility that inward rectification of CFTR  $\text{Cl}^-$  current is caused by a component of the recording solutions, we examined the effect on CFTR of a number of factors in the bath and pipette solutions. These included the nature of the biological buffer and the monovalent cation used in our recording solutions.

Previous work demonstrated that some biological buffers block  $\text{Cl}^-$  channels including CFTR (Hanrahan and Tabcharani, 1990; Ishihara and Welsh, 1997; Tabcharani et al., 1997). Ishihara and Welsh (1997) demonstrated that TRICINE is without effect on CFTR in contrast to other buffers including MOPS and TES. Therefore, we examined the effect of TRICINE-based solutions on the gating kinetics of CFTR using the  $\text{C}_1 \leftrightarrow \text{C}_2 \leftrightarrow \text{O}$  kinetic scheme and by substituting TES (10 mM) by TRICINE (10 mM) in the bath and pipette solutions. Fig. S1 summarizes the effects of TES and TRICINE on the rate constants at  $-50$  and  $+50$  mV. In both TES- and TRICINE-based solutions  $\alpha_1$  and  $\beta_2$  were decreased significantly and  $\beta_1$  was unchanged (Fig. S1). In addition,  $\alpha_2$  was increased in the presence of both biological buffers. However, the increase in  $\alpha_2$  was only statistically significant in the presence of TES (Fig. S1). As explained in the section “Voltage changes the gating kinetics of CFTR” of RESULTS, these data suggest that voltage produces reciprocal changes in  $\alpha_1$  and the rate constants within the bursting state (i.e.,  $\alpha_2$  and  $\beta_2$ ) that tend to counteract each other. The data also indicate that changing the biological buffer is without effect on the gating kinetics of CFTR.

By using the large monovalent cation NMDG that fails to permeate cation channels, we record CFTR  $\text{Cl}^-$  currents uncontaminated by cation currents. However, it is feasible that NMDG might alter the biophysical properties of CFTR. Therefore, we examined the effect of NaCl-based solutions on the inward rectification of CFTR  $\text{Cl}^-$  currents by substituting NMDGCl (147 mM) by NaCl (147 mM) in the bath and pipette solutions. Fig. S2 A demonstrates that the I-V relationship of CFTR  $\text{Cl}^-$  currents recorded in the presence of symmetrical 147 mM NaCl solutions exhibits inward rectification. Fig. S2 B demonstrates that the magnitude of inward rectification observed in the presence of NaCl-based solutions did not differ from that in the presence of NMDGCl-based solutions (NaCl: I at  $+100$  mV =  $72 \pm 6\%$  of that at  $-100$  mV ( $n = 4$ ); NMDGCl: I at  $+100$  mV =  $74 \pm 2\%$  of that at  $-100$  mV ( $n = 10$ );  $P > 0.5$ ).

To investigate further the effect of monovalent cations, we studied the gating kinetics of CFTR using the  $\text{C}_1 \leftrightarrow \text{C}_2 \leftrightarrow \text{O}$  kinetic scheme. Fig. S3 summarizes the effects of 147 mM NMDGCl and 147 mM NaCl solutions on

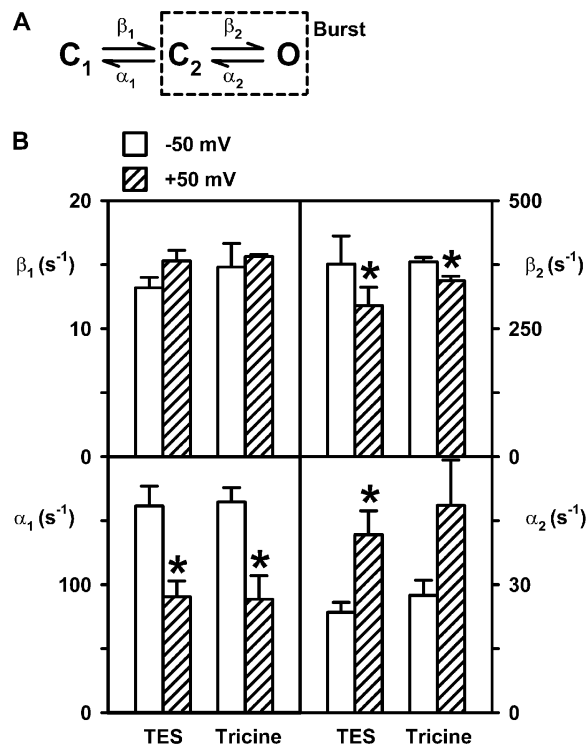

FIGURE S1. Effect of the biological buffer on single-channel kinetics. (A) The  $\text{C}_1 \leftrightarrow \text{C}_2 \leftrightarrow \text{O}$  kinetic scheme that describes CFTR channel gating (Winter et al., 1994). States  $\text{C}_1$ ,  $\text{C}_2$ , and  $\text{O}$  represent two closed states and one open state, respectively, while  $\beta_1$ ,  $\beta_2$ ,  $\alpha_1$ , and  $\alpha_2$  represent the rate constants describing transitions between the open and closed states. States enclosed within the dashed box represent the bursting state. (B) Rate constants at the indicated voltages determined by the maximum likelihood fit to the model shown in A when the recording solutions contained either TES (10 mM) or TRICINE (10 mM). Data are means  $\pm$  SEM (TES,  $n = 8$ ; TRICINE,  $n = 3$ ) at each voltage. The asterisks indicate values that are significantly different from the  $-50$  mV data ( $P < 0.05$ ). Measurements were made using excised inside-out membrane patches from C127 cells expressing wild-type human CFTR. Membrane patches contained only a single active CFTR  $\text{Cl}^-$  channel and were bathed in symmetrical 147 mM  $\text{Cl}^-$  solutions. All intracellular solutions contained PKA (75 nM) and ATP (1 mM).

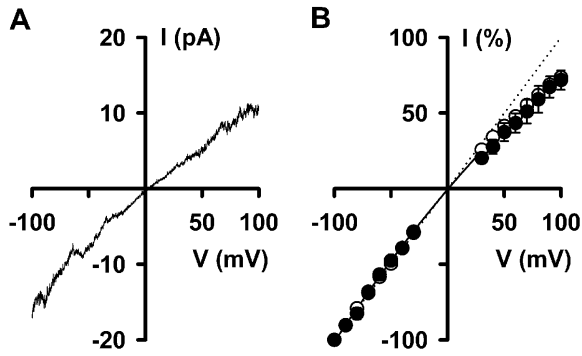

FIGURE S2. I-V relationships of CFTR  $\text{Cl}^-$  currents. (A) I-V relationship of CFTR  $\text{Cl}^-$  currents recorded in the presence of symmetrical 147 mM NaCl solutions. (B) I-V relationships of CFTR  $\text{Cl}^-$  currents recorded in the presence of either 147 mM NaCl solutions (filled circles) or 147 mM NMDGCl solutions (open circles) expressed as a percentage of the current value at  $-100$  mV. Data are means  $\pm$  SEM (NaCl,  $n = 4$  and NMDGCl,  $n = 10$ ) at each voltage. Error bars are smaller than symbol size except where shown. The continuous lines are the fits of second order regressions to the data. The dotted line shows the predicted ohmic I-V relationship. Other details as in Fig. S1.

the rate constants at  $-50$  and  $+50$  mV. In both NMDGCl- and NaCl-based solutions  $\alpha_1$  and  $\beta_2$  were decreased significantly,  $\alpha_2$  was increased significantly, and  $\beta_1$  was unchanged (Fig. S3). Like the effects of TES and TRICINE on channel gating, these data suggest that voltage produces reciprocal changes in  $\alpha_1$  and the rate constants within the bursting state (i.e.,  $\alpha_2$  and  $\beta_2$ ) that tend to offset each other. The data also indicate that changing the monovalent cation is without effect on the gating kinetics of CFTR.

Based on the above data, we suggest that neither TES nor NMDG are responsible for the inward rectification of the CFTR  $\text{Cl}^-$  channel. Comparison of the different solutions employed in studies where inward rectification of the CFTR  $\text{Cl}^-$  channel has been observed (Zhao et al., 1996; Linsdell and Hanrahan, 1999; Lansdell et al., 2000; Cai and Sheppard, 2002; Linsdell and Gong, 2002; this study) suggests that CsEGTA and  $\text{Mg}^{2+}$  are unlikely to be responsible for the inward rectification of CFTR. These data contrast with the results of studies of  $\text{K}^+$  channels, which indicate that EGTA and  $\text{Mg}^{2+}$  cause a voltage-dependent block of current flow through these  $\text{K}^+$  channels (Vandenberg, 1987; Guo and Lu, 2002). Similarly, anion conduction studies indicate that inward rectification of the CFTR  $\text{Cl}^-$  channel is observed when other anions are substituted for  $\text{Cl}^-$  in both the intra- and extracellular solutions (Linsdell, 2001). This suggests that inward rectification of current flow through the CFTR pore is a common feature of anion flow through the CFTR  $\text{Cl}^-$  channel.

Finally, studies of the mechanism of inward rectification of  $\text{K}^+$  channels (Lopatin et al., 1994) raise the possibility that an unidentified agent might be responsible for the inward rectification of CFTR  $\text{Cl}^-$  currents. Several lines of

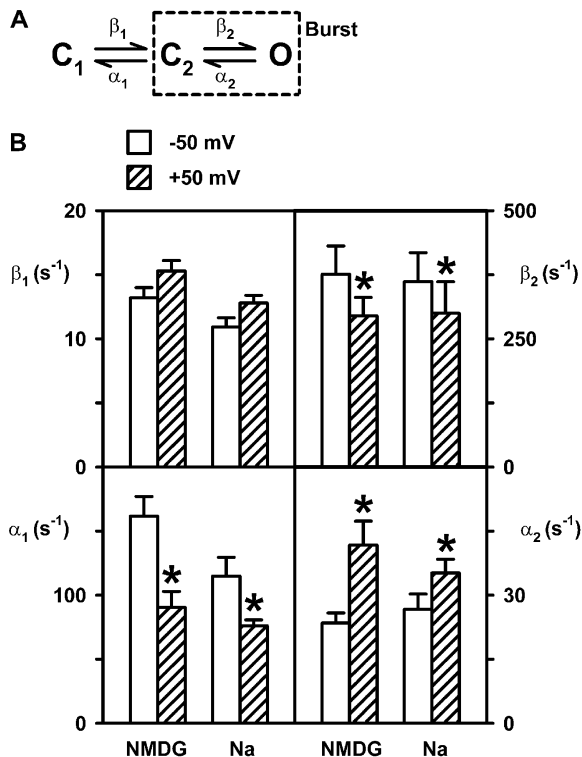

FIGURE S3. Effect of monovalent cations on single-channel kinetics. (A) A linear three-state model of CFTR channel gating (see Fig. 1A and Winter et al., 1994). (B) Rate constants at the indicated voltages determined by the maximum likelihood fit to the model shown in A when the recording solutions contained either NMDGCl (147 mM) or NaCl (147 mM). Data are means  $\pm$  SEM (NMDG,  $n = 8$  and NaCl,  $n = 3$ ) at each voltage. The asterisks indicate values that are significantly different from the  $-50$  mV data ( $P < 0.05$ ). Other details as in Fig. 1.

evidence suggest that this possibility is remote. First, excised membrane patches were moved  $\sim 500$   $\mu\text{m}$  away from the surface of cells during experiments. Second, the intracellular surface of the membrane patch was extensively washed during experiments by the perfusion of different solutions. Third, inward rectification was observed when CFTR  $\text{Cl}^-$  channels were reconstituted into artificial lipid bilayers (Zhao et al., 1996). Fourth, if rectification is caused by an unidentified factor, it is common to both native epithelial cells (Quinton and Reddy, 2000) and recombinant cells (Linsdell and Hanrahan, 1999; Linsdell et al., 2000; Cai and Sheppard, 2002; Linsdell and Gong, 2002). Together, the data suggest that inward rectification is unlikely to be caused by channel block.

#### REFERENCES

- Cai, Z., and D.N. Sheppard. 2002. Phloxine B interacts with the cystic fibrosis transmembrane conductance regulator at multiple sites to modulate channel activity. *J. Biol. Chem.* 277:19546–19553.
- Guo, D., and Z. Lu. 2002. IRK1 inward rectifier  $\text{K}^+$  channels exhibit no intrinsic rectification. *J. Gen. Physiol.* 120:539–551.
- Hanrahan, J.W., and J.A. Tabcharani. 1990. Inhibition of an outwardly rectifying anion channel by HEPES and related buffers. *J. Membr. Biol.* 116:65–77.
- Ishihara, H., and M.J. Welsh. 1997. Block by MOPS reveals a conformation change in the CFTR pore produced by ATP hydrolysis. *Am. J. Physiol.* 273:C1278–C1289.
- Linsdell, K.A., Z. Cai, J.F. Kidd, and D.N. Sheppard. 2000. Two mechanisms of genistein inhibition of cystic fibrosis transmembrane conductance regulator  $\text{Cl}^-$  channels expressed in murine cell line. *J. Physiol.* 524:317–330.
- Linsdell, P. 2001. Relationship between anion binding and anion permeability revealed by mutagenesis within the cystic fibrosis transmembrane conductance regulator chloride channel pore. *J. Physiol.* 531:51–66.
- Linsdell, P., and X. Gong. 2002. Multiple inhibitory effects of  $\text{Au}(\text{CN})_2^-$  ions on cystic fibrosis transmembrane conductance regulator  $\text{Cl}^-$  channel currents. *J. Physiol.* 540:29–38.
- Linsdell, P., and J.W. Hanrahan. 1999. Substrates of multidrug resistance-associated proteins block the cystic fibrosis transmembrane conductance regulator chloride channel. *Br. J. Pharmacol.* 126:1471–1477.
- Lopatin, A.N., E.N. Makhina, and C.G. Nichols. 1994. Potassium channel block by cytoplasmic polyamines as the mechanism of intrinsic rectification. *Nature.* 372:366–369.
- Quinton, P.M., and M.M. Reddy. 2000. CFTR, a rectifying, non-rectifying anion channel? *J. Korean Med. Sci.* 15:S17–S20.
- Tabcharani, J.A., P. Linsdell, and J.W. Hanrahan. 1997. Halide permeation in wild-type and mutant cystic fibrosis transmembrane conductance regulator chloride channels. *J. Gen. Physiol.* 110:341–354.
- Vandenberg, C.A. 1987. Inward rectification of a potassium channel in cardiac ventricular cells depends on internal magnesium ions. *Proc. Natl. Acad. Sci. USA.* 84:2560–2564.
- Winter, M.C., D.N. Sheppard, M.R. Carson, and M.J. Welsh. 1994. Effect of ATP concentration on CFTR  $\text{Cl}^-$  channels: a kinetic analysis of channel regulation. *Biophys. J.* 66:1398–1403.
- Zhao, J., B. Zerhusen, J. Xie, M.L. Drumm, P.B. Davis, and J. Ma. 1996. Rectification of cystic fibrosis transmembrane conductance regulator chloride channel mediated by extracellular divalent cations. *Biophys. J.* 71:2458–2466.
